# Supplementary material
Source: publisher figshare collection journal article supplement (https://tandf.figshare.com/ndownloader/files/17796962)
Supplement: Supplementary file 1 [file 17796962]

## Sheet: Ark1
#	Concentration (ppm)			Ratios									Ratios							Ages
DG11.06	Pb	U		206Pb/238U	1σ	err%	207Pb/235U	1σ	err%	207Pb/206Pb	1σ	err%	208Pb/232Th	1σ	err%	232Th/238U	1σ	err%		206Pb/238U	1σ	207Pb/235U	1σ	207Pb/206Pb	1σ
1	58.3343	279.832		0.208078	0.00129534	0.622525	2.37251	0.0216677	0.913279	0.0826953	0.000704931	0.852444	0.0512418	0.00133471	2.60473	0.299111	0.000779742	0.260686		1218.57	7.5859	1234.36	11.2731	1262.03	16.6556
2	200.986	832.433		0.230313	0.00152868	0.66374	2.94022	0.0256877	0.873665	0.0925892	0.000735876	0.794776	0.0599402	0.00136557	2.27823	0.449564	0.000392751	0.0873627		1336.14	8.86849	1392.33	12.1643	1479.5	15.0682
3	92.314	303.638		0.276265	0.0016632	0.602028	3.79695	0.0315443	0.83078	0.09968	0.000783064	0.785578	0.0705679	0.00141419	2.00401	0.664072	0.00162927	0.245346		1572.53	9.46705	1592.1	13.2269	1618.12	14.6239
4	143.747	485.111		0.268254	0.0017449	0.650466	4.05325	0.0358718	0.885013	0.109586	0.000851561	0.777069	0.0728738	0.00133347	1.82983	0.605526	0.000782904	0.129293		1531.93	9.96469	1644.95	14.558	1792.54	14.1504
5	88.2229	185.817		0.358581	0.00222694	0.621041	6.19232	0.0520449	0.840474	0.125246	0.00096281	0.768735	0.0993544	0.00173365	1.74492	1.44364	0.00481748	0.333702		1975.45	12.2683	2003.36	16.8378	2032.28	13.6049
6	124.138	207.67		0.505236	0.00307394	0.608416	13.3294	0.108122	0.811153	0.191345	0.00143955	0.752331	0.131881	0.00219998	1.66815	0.66266	0.0158016	2.38456		2636.26	16.0394	2703.27	21.9277	2753.75	12.3599
7	244.786	1294.81		0.181702	0.0011608	0.638848	2.50229	0.0271632	1.08554	0.0998792	0.000947054	0.9482	0.0647368	0.00154534	2.38712	0.282725	0.000222252	0.0786107		1076.27	6.87572	1272.7	13.8156	1621.83	17.6427
8	129.495	684.647		0.189279	0.00120894	0.638705	2.1317	0.0179825	0.843576	0.081681	0.000627335	0.76803	0.0549902	0.00101611	1.84781	0.246862	0.00106543	0.431589		1117.47	7.13734	1159.14	9.77819	1237.88	15.0582
9	58.5263	215.791		0.2444	0.00184951	0.756756	3.24552	0.0343438	1.05819	0.0963121	0.000824148	0.855705	0.0667452	0.00135707	2.03321	0.672117	0.00105612	0.157133		1409.53	10.6667	1468.11	15.5354	1553.87	16.0635
10	145.307	460.919		0.295962	0.0020805	0.702961	4.24092	0.0371663	0.876373	0.103926	0.00078159	0.752067	0.0778964	0.0014841	1.90522	0.474956	0.011284	2.37581		1671.25	11.7483	1681.98	14.7404	1695.38	13.8623
11	40.3434	216.296		0.171566	0.00106352	0.619887	2.47777	0.0248077	1.00121	0.104744	0.000999698	0.954421	0.0379024	0.000623252	1.64436	0.675969	0.00793487	1.17385		1020.73	6.32739	1265.56	12.6709	1709.82	17.56
12	107.051	377.383		0.255202	0.00206691	0.809914	3.30145	0.0325018	0.984473	0.0938252	0.000716478	0.76363	0.0757678	0.00120007	1.58388	0.633557	0.00112079	0.176904		1465.25	11.8672	1481.39	14.5839	1504.6	14.429
13	152.097	501.502		0.29959	0.00189312	0.631905	4.33193	0.0352705	0.814198	0.104871	0.000781179	0.744899	0.0825078	0.00136504	1.65443	0.230882	0.00108247	0.468842		1689.27	10.6746	1699.46	13.837	1712.05	13.7013
14	105.026	305.408		0.302172	0.00186489	0.61716	7.65087	0.0640854	0.837623	0.183635	0.00140735	0.766385	0.0992945	0.0017919	1.80463	0.392726	0.000767027	0.195309		1702.07	10.5045	2190.85	18.3511	2685.97	12.6704
15	110.514	695.949		0.163775	0.00100981	0.616584	1.72967	0.0144757	0.836906	0.0765972	0.000594234	0.775791	0.0481996	0.000991791	2.05768	0.145521	0.000992812	0.682245		977.723	6.02848	1019.63	8.53332	1110.72	15.495
16	51.4564	263.38		0.182892	0.00131705	0.720125	2.2246	0.0215453	0.968504	0.0882175	0.000746296	0.845973	0.056521	0.00127391	2.25386	0.466317	0.00130515	0.279886		1082.76	7.79721	1188.82	11.5138	1387.23	16.2416
17	224.229	1437.63		0.155803	0.00127761	0.820016	1.72808	0.017498	1.01257	0.0804426	0.000665149	0.826862	0.0568376	0.00143877	2.53138	0.205651	0.00118584	0.576627		933.41	7.65411	1019.03	10.3184	1207.86	16.2819
18	100.764	557.475		0.178292	0.00136122	0.76348	1.99243	0.0185867	0.932866	0.0810498	0.000684502	0.844545	0.0534564	0.00112827	2.11064	0.296728	0.00215518	0.726314		1057.63	8.07482	1112.95	10.3823	1222.65	16.5946
19	137.88	536.419		0.261932	0.00163966	0.625988	3.41346	0.0277806	0.813855	0.0945161	0.000708081	0.749164	0.0752063	0.0013917	1.85051	0.133766	0.000323608	0.241921		1499.72	9.38805	1507.5	12.2689	1518.45	14.1296
20	132.87	509.047		0.254806	0.00169271	0.664315	3.26826	0.0274132	0.83877	0.0930264	0.000694469	0.746529	0.0716888	0.00125229	1.74684	0.3169	0.000331635	0.10465		1463.21	9.72033	1473.53	12.3595	1488.43	14.1365
21	160.948	635.925		0.26255	0.00164787	0.627639	3.29413	0.0266904	0.81024	0.0909971	0.000676675	0.743622	0.0736571	0.00129038	1.75187	0.0786707	8.96007e-05	0.113893		1502.88	9.43263	1479.67	11.9888	1446.54	14.1612
22	18.0599	104.723		0.164029	0.00113594	0.69252	2.00447	0.0267751	1.33577	0.0886294	0.00112569	1.27011	0.0478213	0.00108954	2.27836	0.426729	0.00305393	0.71566		979.13	6.78067	1117.03	14.9209	1396.16	24.3545
23	202.142	770.031		0.271134	0.00203728	0.751392	3.6434	0.0353465	0.970152	0.0974591	0.000739094	0.758364	0.0883831	0.00174943	1.97938	0.062798	0.000422864	0.673372		1546.55	11.6207	1559.07	15.1253	1576.06	14.1948
24	174.745	503.74		0.295531	0.00188482	0.637775	4.34163	0.036305	0.836206	0.106549	0.000814708	0.764634	0.0828522	0.00177066	2.13714	0.879907	0.0415219	4.7189		1669.11	10.6452	1701.31	14.2264	1741.19	14.0129
25	250.565	1069.56		0.230894	0.00208514	0.903074	3.01502	0.0322308	1.06901	0.094706	0.000723387	0.763824	0.0558452	0.00125119	2.24046	0.31555	0.000807557	0.25592		1339.18	12.0938	1411.43	15.0883	1522.23	14.3989
26	34.0339	199.661		0.14862	0.000953438	0.641527	1.50876	0.0158742	1.05213	0.0736279	0.000746737	1.0142	0.0445303	0.000858841	1.92867	0.83006	0.00702601	0.846447		893.224	5.73027	933.94	9.8263	1031.29	20.4992
27	215.685	965.58		0.220813	0.00136875	0.619867	3.04907	0.0258416	0.847524	0.100148	0.000783642	0.782487	0.0689834	0.00147588	2.13947	0.215893	0.000575276	0.266464		1286.17	7.97256	1420	12.0348	1626.83	14.55
28	91.0146	431.621		0.210783	0.00171671	0.814444	2.58914	0.0255203	0.985666	0.0890879	0.000684906	0.768798	0.0548464	0.00102593	1.87054	0.252266	0.00212749	0.843351		1232.99	10.042	1297.57	12.7897	1406.05	14.7218
29	30.4639	136.25		0.216108	0.00140473	0.650013	2.6552	0.0266289	1.0029	0.0891094	0.000844642	0.947871	0.0640219	0.00123969	1.93636	0.353658	0.00259522	0.733822		1261.28	8.19848	1316.09	13.199	1406.51	18.1497
30	201.747	1496.62		0.135841	0.000833571	0.613638	1.67232	0.0142966	0.854898	0.0892867	0.000766865	0.858879	0.115578	0.00310967	2.69054	0.0660916	6.80082e-05	0.1029		821.101	5.03859	998.067	8.53246	1410.32	16.4371
31	128.334	479.037		0.250809	0.00154297	0.615199	3.71422	0.0318068	0.856351	0.107405	0.000854821	0.795888	0.0702091	0.00160447	2.28527	0.44628	0.0026399	0.591534		1442.65	8.87515	1574.44	13.4827	1755.84	14.5591
32	134.027	516.92		0.257866	0.00165916	0.64342	3.45177	0.0304948	0.883453	0.0970837	0.000786092	0.809705	0.078383	0.00197584	2.52074	0.208927	0.00100269	0.479922		1478.92	9.51564	1516.27	13.3956	1568.83	15.1701
33	33.9873	218.486		0.149789	0.00115403	0.770433	1.5336	0.0179596	1.17108	0.0742556	0.000773692	1.04193	0.0460172	0.00118532	2.57581	0.40367	0.00310566	0.769356		899.783	6.93222	943.942	11.0543	1048.42	21.0052
34	138.019	509.754		0.259768	0.00158286	0.609335	3.28044	0.0278595	0.849262	0.0915893	0.00072959	0.796589	0.0759246	0.00173299	2.28251	0.380105	0.000643571	0.169314		1488.66	9.07091	1476.42	12.5387	1458.88	15.1446
35	99.5313	591.991		0.154267	0.0030691	1.98947	2.99587	0.0805026	2.68712	0.140847	0.00146345	1.03904	0.0574775	0.00140988	2.45293	0.312674	0.00030581	0.097805		924.839	18.3994	1406.57	37.7962	2237.65	17.9727
36	115.944	513.121		0.231522	0.00140095	0.605103	2.84361	0.0236054	0.830121	0.0890794	0.000692413	0.777299	0.064356	0.00135766	2.10961	0.135616	0.0016443	1.21247		1342.47	8.12333	1367.12	11.3488	1405.87	14.8849
37	342.815	1575.52		0.202349	0.0015421	0.762097	2.39628	0.0229143	0.956244	0.0858885	0.000659231	0.767543	0.0569137	0.00122347	2.14969	0.549471	0.00274829	0.500171		1187.93	9.05315	1241.49	11.8717	1335.67	14.8417
38	33.2509	71.8555		0.386716	0.00256238	0.662601	9.8255	0.0904844	0.920914	0.184273	0.00157351	0.853902	0.134455	0.00288166	2.14322	0.562069	0.00269507	0.479491		2107.58	13.9648	2418.55	22.2727	2691.71	14.1097
39	109.192	432.301		0.244744	0.00174254	0.711985	3.36941	0.0285592	0.847601	0.0998482	0.000854883	0.856183	0.085527	0.00203988	2.38507	0.260757	0.000616038	0.23625		1411.31	10.0483	1497.31	12.6912	1621.26	15.9318
40	85.6776	307.121		0.231367	0.00154649	0.668413	4.01357	0.0383084	0.95447	0.125814	0.00109564	0.87084	0.0887666	0.00229443	2.58479	0.688255	0.000790706	0.114886		1341.66	8.96783	1636.95	15.6242	2040.28	15.3978
41	30.9794	146.858		0.193492	0.00151792	0.784485	2.68518	0.0303459	1.13013	0.100649	0.000951813	0.945678	0.0663161	0.00176953	2.66833	0.457808	0.000771247	0.168465		1140.27	8.94521	1324.38	14.9672	1636.1	17.5634
42	50.1486	270.066		0.182883	0.00138692	0.758367	2.4949	0.0246872	0.989505	0.0989418	0.00081584	0.824566	0.0457401	0.00111899	2.44641	0.291656	0.00103986	0.356538		1082.7	8.21087	1270.55	12.5722	1604.27	15.3772
43	87.879	327.342		0.25781	0.00155619	0.603617	3.35858	0.0275371	0.819905	0.094483	0.000738639	0.781769	0.0715012	0.00153947	2.15307	0.386146	0.000892024	0.231007		1478.63	8.92526	1494.79	12.2559	1517.79	14.7459
44	100.179	284.225		0.321304	0.00296384	0.922438	5.36668	0.0567307	1.05709	0.12114	0.000928983	0.766868	0.0880211	0.00173879	1.97542	0.526584	0.000474935	0.0901916		1796.1	16.5679	1879.55	19.8686	1973.08	13.6653
45	126.449	509.905		0.231572	0.00192831	0.832705	3.16051	0.0306902	0.971052	0.0989849	0.000767617	0.775488	0.08263	0.00153911	1.86266	0.382377	0.0057315	1.49891		1342.73	11.181	1447.57	14.0566	1605.08	14.4605
46	186.256	733.983		0.260961	0.00161372	0.618379	3.41547	0.0278215	0.814574	0.0949236	0.000716609	0.754933	0.064707	0.0012028	1.85885	0.112169	0.000706221	0.629602		1494.75	9.24324	1507.96	12.2835	1526.56	14.2231
47	72.1167	341.618		0.208506	0.00210888	1.01143	2.68905	0.0313708	1.16661	0.0935363	0.000725121	0.775229	0.0570356	0.00114828	2.01328	0.274228	0.00380855	1.38882		1220.85	12.348	1325.45	15.4628	1498.77	14.6596
48	83.9916	326.963		0.253289	0.00155054	0.612165	3.12255	0.0262879	0.841872	0.0894113	0.000699789	0.782663	0.0639808	0.00134	2.09438	0.321095	0.000940959	0.293047		1455.41	8.90953	1438.26	12.1083	1412.99	14.973
49	114.767	401.851		0.275247	0.00174204	0.632902	3.72086	0.0314014	0.84393	0.0980435	0.000757999	0.773125	0.0666172	0.00138878	2.08471	0.410248	0.00134302	0.327367		1567.38	9.91999	1575.86	13.2992	1587.24	14.4499
50	124.011	457.111		0.259574	0.00159345	0.613872	3.37272	0.0275245	0.816091	0.0942361	0.000717802	0.761706	0.0663532	0.00125151	1.88613	0.437062	0.000830483	0.190015		1487.66	9.13234	1498.08	12.2257	1512.85	14.3769
51	63.1334	242.664		0.263061	0.00159312	0.605608	3.45499	0.0282759	0.818408	0.0952553	0.000734278	0.770853	0.0676209	0.00115022	1.70098	0.180753	0.00307964	1.70379		1505.48	9.11734	1517.01	12.4153	1533.13	14.5104
52	103.56	451.157		0.231257	0.00164102	0.709609	2.88306	0.0254457	0.882596	0.0904183	0.000678098	0.749957	0.0575303	0.000927035	1.61139	0.222611	0.000270348	0.121444		1341.09	9.51647	1377.49	12.1577	1434.38	14.3055
53	168.546	562.947		0.288263	0.00173918	0.603331	4.18416	0.0330781	0.790555	0.105273	0.000779545	0.740496	0.0721701	0.00109002	1.51035	0.372604	0.00240159	0.644543		1632.84	9.85144	1670.92	13.2096	1719.09	13.6082
54	60.4353	278.131		0.210758	0.00155981	0.740094	2.77268	0.0269956	0.97363	0.0954144	0.000755046	0.791333	0.0579487	0.000983855	1.6978	0.343185	0.00279241	0.813673		1232.85	9.12429	1348.21	13.1266	1536.27	14.8897
55	191.192	774.831		0.174198	0.00114408	0.656768	4.32886	0.0721672	1.66712	0.180231	0.002696	1.49586	0.0577428	0.00183769	3.18254	1.36078	0.00537774	0.395195		1035.2	6.79885	1698.88	28.3223	2655	24.803
56	250.733	709.897		0.337605	0.00206459	0.611541	5.73747	0.0459339	0.800596	0.123257	0.00092498	0.75045	0.0846581	0.00147914	1.74719	0.33508	0.00687515	2.05179		1875.14	11.4672	1937.03	15.5078	2003.89	13.3249
57	26.4687	93.3547		0.262893	0.00161678	0.614997	3.53897	0.0412099	1.16446	0.097633	0.00108298	1.10924	0.0702461	0.0012496	1.77889	0.548261	0.0041881	0.763889		1504.63	9.2534	1535.97	17.8858	1579.4	20.7533
58	68.2192	135.37		0.415145	0.00258561	0.622821	9.93654	0.0818899	0.824129	0.173594	0.00131017	0.754733	0.12196	0.00198457	1.62722	0.768768	0.000608075	0.0790972		2238.4	13.9412	2428.91	20.0173	2592.6	12.5894
59	42.686	147.11		0.271866	0.00167184	0.614949	3.62048	0.0311457	0.860264	0.0965851	0.000782916	0.810597	0.0763459	0.00127836	1.67443	0.479806	0.000867415	0.180785		1550.27	9.53335	1554.04	13.3689	1559.18	15.2061
60	295.05	1175.23		0.246178	0.00161975	0.65796	3.40108	0.028656	0.842554	0.1002	0.000746497	0.745009	0.0663486	0.00116285	1.75264	0.284984	0.00187275	0.657141		1418.74	9.33471	1504.65	12.6775	1627.79	13.8513
61	99.7699	319.335		0.294935	0.00259117	0.878557	7.3952	0.0765897	1.03567	0.181854	0.00138476	0.761467	0.06401	0.00137091	2.14171	0.187713	0.000964122	0.513614		1666.14	14.638	2160.39	22.3745	2669.85	12.6082
62	164.675	728.306		0.22646	0.00146264	0.645872	2.86601	0.0240927	0.840636	0.0917875	0.000703511	0.766456	0.0557297	0.00120783	2.16729	0.246728	0.00175777	0.712435		1315.92	8.49916	1373.02	11.5421	1462.99	14.5636
63	141.699	590.05		0.239111	0.00144427	0.604019	2.9662	0.0247065	0.832934	0.0899706	0.000705274	0.783894	0.0623471	0.00149141	2.3921	0.265646	0.00112382	0.423052		1382.07	8.34798	1399	11.6528	1424.91	14.9722
64	19.4723	72.2098		0.205665	0.00226232	1.1	3.13467	0.0521851	1.66477	0.110543	0.00145164	1.31319	0.072989	0.00194625	2.6665	1.12679	0.00759169	0.673745		1205.68	13.2625	1441.24	23.9934	1808.35	23.8667
65	40.1535	201.816		0.197388	0.00131728	0.667352	2.2196	0.0211402	0.952431	0.0815555	0.0007276	0.892154	0.0585844	0.00157345	2.68578	0.275611	0.00293607	1.06529		1161.27	7.74979	1187.25	11.3077	1234.86	17.4993
66	32.1271	367.428		0.0848569	0.000602697	0.710251	0.916042	0.00959086	1.04699	0.0782937	0.000822497	1.05053	0.0309247	0.000748028	2.41886	0.303844	0.000450087	0.148131		525.048	3.72916	660.265	6.9129	1154.34	20.8479
67	33.3651	165.266		0.191652	0.00194387	1.01427	2.42525	0.0306787	1.26497	0.0917789	0.000980253	1.06806	0.0757628	0.00176192	2.32557	0.312706	0.00153568	0.491093		1130.32	11.4645	1250.11	15.8136	1462.81	20.2949
68	62.7306	252.009		0.240994	0.00151643	0.629238	3.12527	0.026883	0.860183	0.0940546	0.000742558	0.789497	0.0682723	0.00134915	1.97614	0.345531	0.0022926	0.663501		1391.86	8.75812	1438.93	12.3774	1509.21	14.9086
69	341.527	505.101		0.533653	0.0033167	0.621509	14.9368	0.121956	0.816479	0.203001	0.00152932	0.753357	0.140304	0.00261214	1.86177	0.978918	0.00135171	0.138082		2756.82	17.1339	2811.22	22.953	2850.47	12.2688
70	65.3168	214.267		0.275536	0.00187853	0.681774	3.5099	0.0314152	0.895044	0.0923881	0.00074264	0.803826	0.0893398	0.00167089	1.87026	0.566206	0.000972677	0.171789		1568.84	10.6959	1529.45	13.6892	1475.38	15.2482
71	175.316	860.468		0.197211	0.00121549	0.616339	2.17103	0.0179729	0.82785	0.0798424	0.000616703	0.7724	0.0535231	0.0010557	1.97242	0.413771	0.00283565	0.685318		1160.32	7.15151	1171.81	9.70082	1193.1	15.242
72	109.016	425.798		0.245055	0.00153001	0.624353	3.61878	0.0305953	0.84546	0.107102	0.000841666	0.785854	0.0644358	0.00141126	2.19018	0.374595	0.000469401	0.125309		1412.92	8.82162	1553.67	13.1357	1750.68	14.3848
73	191.272	640.622		0.290094	0.0017566	0.605528	4.18896	0.0344517	0.822442	0.104729	0.000815498	0.778678	0.0792566	0.00168661	2.12804	0.304017	0.00154139	0.507008		1642	9.94278	1671.86	13.7501	1709.55	14.3271
74	155.087	596.518		0.265667	0.00173352	0.652515	3.47207	0.0293461	0.845203	0.0947872	0.000726756	0.766723	0.0685761	0.00132829	1.93696	0.135782	0.000127774	0.0941021		1518.77	9.91021	1520.89	12.8546	1523.85	14.4504
75	71.9653	239.317		0.261083	0.00157176	0.602014	3.46327	0.0287388	0.829815	0.096207	0.000752661	0.782335	0.0710848	0.00128504	1.80776	0.85127	0.00347589	0.408319		1495.38	9.00242	1518.89	12.604	1551.82	14.6902
76	129.072	371.07		0.293019	0.00178512	0.609216	4.25937	0.0344857	0.809644	0.105426	0.000800051	0.758875	0.0812769	0.00141402	1.73976	0.948118	0.000936888	0.0988156		1656.6	10.0923	1685.55	13.6469	1721.76	13.9413
77	31.7134	129.033		0.226603	0.00139317	0.614806	2.80162	0.0263446	0.940335	0.0896689	0.000795708	0.887385	0.0696332	0.00124019	1.78104	0.525345	0.00436115	0.83015		1316.67	8.09498	1355.97	12.7507	1418.49	16.9637
78	39.5454	214.584		0.18148	0.00118505	0.652995	2.04583	0.0192075	0.938864	0.0817597	0.000697857	0.853546	0.0467288	0.00088592	1.89587	0.350256	0.0011659	0.332871		1075.05	7.02005	1130.91	10.6177	1239.77	16.7303
79	120.643	255.782		0.420623	0.00258061	0.613522	8.94202	0.0738518	0.825896	0.154185	0.00118754	0.770204	0.111476	0.00228859	2.05298	0.525407	0.00146984	0.279753		2263.31	13.8859	2332.1	19.2607	2392.86	13.1063
80	64.7038	220.01		0.283913	0.00171877	0.605388	3.94893	0.0340053	0.861127	0.100877	0.000818667	0.811547	0.0759594	0.00173844	2.28865	0.353175	0.000719939	0.203848		1611.04	9.75303	1623.77	13.9827	1640.31	15.0641
81	40.8301	244.102		0.165254	0.00100321	0.607073	1.66911	0.0155895	0.934002	0.0732542	0.000645865	0.881676	0.0500018	0.00113187	2.26365	0.313579	0.000419709	0.133845		985.906	5.98517	996.847	9.31057	1020.99	17.8483
82	92.6695	407.807		0.225181	0.00145481	0.646063	2.78464	0.0238919	0.857988	0.0896884	0.000697571	0.777772	0.0653886	0.00132599	2.02786	0.258427	0.000772197	0.298806		1309.19	8.45822	1351.43	11.5951	1418.9	14.8674
83	105.157	394.608		0.250127	0.00156249	0.62468	3.24432	0.0269275	0.829991	0.0940721	0.000720854	0.766278	0.068031	0.00125995	1.85202	0.496575	0.00192406	0.387467		1439.13	8.98997	1467.82	12.1828	1509.56	14.4695
84	55.2098	295.462		0.164469	0.00141013	0.857385	2.53754	0.0334632	1.31873	0.1119	0.00103859	0.928147	0.0664621	0.00128439	1.93252	0.490616	0.000984315	0.200628		981.564	8.41578	1282.87	16.9175	1830.5	16.8231
85	138.555	444.442		0.260813	0.00162896	0.624572	4.08307	0.0398791	0.976694	0.113542	0.00101134	0.890724	0.0841024	0.00152998	1.81919	0.819687	0.00466312	0.56889		1494	9.3311	1650.93	16.1245	1856.86	16.0932
86	121.632	595.44		0.201894	0.00132168	0.654642	2.28641	0.0192507	0.841961	0.0821353	0.000620336	0.755261	0.0668121	0.0012545	1.87766	0.258621	0.00130221	0.503521		1185.49	7.76069	1208.1	10.1717	1248.74	14.7848
87	235.119	1141.89		0.201082	0.00155696	0.774292	3.51179	0.035121	1.00009	0.126664	0.000994615	0.785236	0.0749476	0.00186959	2.49453	0.148165	0.000348518	0.235223		1181.13	9.14538	1529.87	15.3	2052.18	13.8653
88	13.1497	79.1561		0.15681	0.00114106	0.727669	1.84518	0.0328803	1.78196	0.0853423	0.00143348	1.67968	0.064458	0.00154852	2.40237	0.332996	0.00267361	0.802895		939.023	6.83298	1061.71	18.9192	1323.33	32.5355
89	66.3105	269.805		0.228063	0.00137618	0.603422	2.78908	0.0233747	0.838078	0.0886961	0.000702189	0.791679	0.0723631	0.00165294	2.28423	0.486696	0.000793307	0.162998		1324.34	7.99136	1352.62	11.336	1397.6	15.1775
90	271.084	1271.53		0.21665	0.00162858	0.751708	2.63583	0.0243569	0.924068	0.0882386	0.000664751	0.753356	0.0691408	0.0015185	2.19623	0.149741	0.000474575	0.316931		1264.15	9.50271	1310.7	12.1117	1387.68	14.4625
91	95.8069	388.988		0.24472	0.00154104	0.629718	3.00967	0.0255707	0.849618	0.0891967	0.000685024	0.767993	0.0746521	0.00152422	2.04176	0.237528	0.00213074	0.897048		1411.19	8.8865	1410.07	11.9802	1408.39	14.7016
92	208.236	777.514		0.26553	0.00181633	0.684038	3.52526	0.0298245	0.846021	0.0962888	0.000716961	0.744594	0.0797338	0.00151439	1.89931	0.226126	0.000898101	0.397169		1518.07	10.3842	1532.9	12.9686	1553.41	13.9786
93	221.784	975.276		0.23739	0.00150179	0.632624	2.85859	0.0230548	0.806511	0.0873349	0.000650936	0.745333	0.0585163	0.00111827	1.91104	0.07631	0.000342074	0.448269		1373.12	8.68666	1371.07	11.0579	1367.89	14.3477
94	150.832	799.439		0.191764	0.00119056	0.620846	2.27487	0.0183389	0.806155	0.0860372	0.00064916	0.75451	0.0457313	0.000888021	1.94182	0.208719	0.00135027	0.646934		1130.93	7.02131	1204.53	9.71034	1339.02	14.5828
95	42.3737	167.427		0.240408	0.00151194	0.628904	3.13678	0.0270641	0.8628	0.0946309	0.000792276	0.837227	0.0603039	0.00127532	2.11483	0.478467	0.0076388	1.59652		1388.82	8.73433	1441.76	12.4395	1520.74	15.7857
96	53.3388	187.262		0.268787	0.00188391	0.700895	3.93505	0.036893	0.937549	0.106179	0.000861646	0.8115	0.0609918	0.00150702	2.47086	0.513388	0.00157304	0.306403		1534.64	10.7562	1620.92	15.1969	1734.83	14.8836
97	348.746	1895.82		0.177465	0.00145858	0.8219	2.513	0.0251949	1.00258	0.102702	0.000804067	0.782913	0.0546939	0.00139936	2.55852	0.30333	0.00129092	0.425583		1053.11	8.65552	1275.8	12.7909	1673.52	14.471
98	287.39	1303.54		0.228002	0.00161218	0.707089	3.0889	0.0272732	0.882943	0.0982571	0.000745604	0.75883	0.0500511	0.00110666	2.21106	0.0831845	0.000355117	0.426903		1324.02	9.36198	1429.94	12.6255	1591.31	14.1752
99	142.772	672.886		0.216477	0.00129915	0.600134	2.55355	0.020281	0.794227	0.085552	0.000649791	0.759527	0.0474007	0.000904003	1.90715	0.209999	0.00243416	1.15913		1263.24	7.5811	1287.45	10.2253	1328.08	14.7023
100	300.335	1087.64		0.271148	0.00167161	0.616493	3.75642	0.030224	0.804596	0.100477	0.000749391	0.745833	0.0649293	0.00110411	1.70048	0.312752	0.00316742	1.01276		1546.63	9.53483	1583.49	12.7407	1632.93	13.8575
101	121.411	571.53		0.212688	0.00136214	0.640442	2.46168	0.0202178	0.821302	0.0839436	0.000629767	0.750226	0.0508428	0.000786848	1.54761	0.288349	0.00066646	0.23113		1243.12	7.96147	1260.86	10.3554	1291.25	14.5977
102	29.8756	239.912		0.123312	0.000812971	0.659279	1.27755	0.0125991	0.986195	0.0751399	0.000687718	0.91525	0.0325702	0.000510709	1.56802	0.342057	0.000941637	0.275286		749.599	4.94195	835.761	8.24224	1072.25	18.3855
103	212.227	735.556		0.270822	0.00197926	0.730836	6.19631	0.062683	1.01162	0.165939	0.00130115	0.784117	0.0538865	0.00116982	2.1709	0.319166	0.000874973	0.274144		1544.97	11.2912	2003.93	20.2721	2517.09	13.1766
104	28.0677	177.408		0.154036	0.00104196	0.676442	1.60826	0.0169809	1.05586	0.0757237	0.000752922	0.994301	0.0508349	0.000836348	1.64522	0.331771	0.00533723	1.60871		923.548	6.24727	973.429	10.278	1087.77	19.9272
105	124.887	310.208		0.333477	0.00211658	0.634702	5.4962	0.0460101	0.837126	0.119535	0.000916868	0.767028	0.0853441	0.00134944	1.58117	1.06294	0.00180564	0.169873		1855.21	11.7751	1900	15.9054	1949.28	13.7063
106	30.7256	124.933		0.252145	0.00154695	0.613517	3.18361	0.0283727	0.891211	0.0915732	0.000766108	0.836608	0.0672595	0.00109974	1.63508	0.129462	0.000263934	0.20387		1449.53	8.89311	1453.19	12.951	1458.55	15.9061
107	112.164	349.94		0.293706	0.00179429	0.610914	4.45686	0.0362209	0.812701	0.110056	0.000833406	0.757256	0.0778762	0.00111044	1.42591	0.561161	0.000750736	0.133783		1660.02	10.1413	1722.98	14.0026	1800.33	13.7764
108	86.4262	399.253		0.220641	0.00170026	0.770601	2.72764	0.0253747	0.930278	0.0896602	0.000680765	0.759273	0.0585995	0.000898323	1.53299	0.161844	0.00079304	0.490002		1285.26	9.90425	1336.02	12.4287	1418.3	14.515
109	31.0551	153.608		0.197336	0.00124188	0.62932	2.59495	0.0240641	0.927345	0.0953718	0.000842818	0.883719	0.0478506	0.00123506	2.58107	0.35866	0.00113592	0.316712		1161	7.30638	1299.21	12.0482	1535.43	16.6299
110	89.5061	333.188		0.266717	0.0016169	0.606226	3.43239	0.0280799	0.818087	0.0933352	0.000717431	0.768661	0.0715159	0.00117717	1.64603	0.258046	0.005561	2.15504		1524.11	9.23957	1511.84	12.3682	1494.7	14.5433
111	71.173	318.523		0.227454	0.00162033	0.712376	2.73942	0.0273263	0.997521	0.0873504	0.000712715	0.815927	0.0682168	0.00127054	1.8625	0.155912	0.000396264	0.254159		1321.14	9.41148	1339.22	13.359	1368.24	15.7059
112	83.0186	300.308		0.263396	0.00163592	0.621085	3.77933	0.032279	0.854092	0.104065	0.0008345	0.801903	0.0723007	0.00148063	2.04787	0.389678	0.00765176	1.96361		1507.19	9.36096	1588.36	13.5661	1697.85	14.7763
113	140.427	593.339		0.231695	0.00155181	0.669765	3.12858	0.0274213	0.876477	0.0979331	0.000769997	0.786248	0.0566104	0.00115591	2.04187	0.331365	0.000626945	0.189201		1343.38	8.99745	1439.75	12.619	1585.14	14.6992
114	82.7573	387.702		0.202367	0.00152202	0.752112	2.65588	0.0261974	0.986394	0.0951849	0.000778262	0.817632	0.0646728	0.00123474	1.90921	0.381185	0.00237854	0.623986		1188.02	8.93526	1316.28	12.9837	1531.74	15.3938
115	259.906	684.509		0.37135	0.00248986	0.670489	7.22938	0.063437	0.877489	0.141194	0.00107169	0.75902	0.0848167	0.00147034	1.73355	0.170973	0.000583757	0.341432		2035.75	13.6495	2140.13	18.7794	2241.91	13.1231
116	178.968	528.262		0.332308	0.00233961	0.704048	5.68653	0.0501787	0.882414	0.124109	0.000935528	0.753793	0.0830553	0.00150176	1.80815	0.210621	0.00278653	1.32301		1849.56	13.0218	1929.32	17.0246	2016.13	13.3653
117	79.2055	392.872		0.199663	0.00124358	0.622836	2.22351	0.018662	0.8393	0.0807681	0.000631645	0.782047	0.0553486	0.000960031	1.73452	0.305181	0.00127985	0.419374		1173.51	7.30906	1188.48	9.97489	1215.81	15.3817
118	72.3865	208.689		0.315919	0.00254316	0.805003	5.2217	0.0528077	1.01131	0.119877	0.000938911	0.783231	0.0870023	0.00161256	1.85347	0.532415	0.000552529	0.103778		1769.77	14.2467	1856.16	18.7716	1954.38	13.9875
119	161.779	801.522		0.192632	0.00117336	0.609122	2.19324	0.018364	0.8373	0.0825764	0.000646864	0.783352	0.0502147	0.00100146	1.99435	0.484755	0.00157893	0.325718		1135.62	6.91729	1178.89	9.87089	1259.22	15.3117
120	224.786	1358.58		0.159862	0.00112207	0.701898	2.91038	0.0284554	0.97772	0.132039	0.00108187	0.819352	0.0472148	0.00128581	2.72331	0.211556	0.000647733	0.306176		956.009	6.7102	1384.61	13.5376	2125.27	14.3488
121	114.931	303.204		0.362151	0.00227803	0.629027	6.28208	0.0534922	0.851505	0.125809	0.00098681	0.78437	0.0979706	0.00213475	2.17897	0.303294	0.000555042	0.183005		1992.36	12.5325	2015.96	17.166	2040.21	13.869
122	248.721	395.266		0.511601	0.00322193	0.629774	13.1821	0.109587	0.831332	0.186876	0.0014296	0.765	0.136363	0.00264655	1.94081	0.866656	0.000859809	0.0992099		2663.46	16.7738	2692.78	22.3859	2714.86	12.6133
123	110.628	561.799		0.19144	0.00120078	0.627237	2.17766	0.0181657	0.834185	0.0825003	0.000649404	0.787153	0.0514597	0.00091689	1.78177	0.388697	0.00386365	0.994		1129.17	7.08258	1173.93	9.79275	1257.42	15.39
124	310.227	1304.57		0.231826	0.00148601	0.641003	2.78992	0.0229311	0.821927	0.0872825	0.000667539	0.764802	0.0672279	0.0011108	1.65229	0.332666	0.000422373	0.126966		1344.06	8.61548	1352.84	11.1193	1366.74	14.7249
125	251.499	998.9		0.254889	0.0018765	0.7362	3.3481	0.0315375	0.941952	0.0952677	0.00071396	0.749425	0.0711006	0.00112943	1.5885	0.161539	0.000753103	0.466205		1463.64	10.7753	1492.35	14.0572	1533.37	14.1065
126	51.4273	94.097		0.398185	0.00348936	0.876315	10.2788	0.10906	1.06101	0.187222	0.00143423	0.766058	0.125917	0.00198007	1.57252	1.24539	0.013327	1.07011		2160.68	18.9343	2460.2	26.103	2717.91	12.6272
127	125.594	493.531		0.249036	0.00166274	0.667669	3.18162	0.0277787	0.873099	0.0926586	0.000704242	0.76004	0.0709084	0.00117693	1.65978	0.304324	0.00184484	0.606207		1433.5	9.57105	1452.71	12.6836	1480.92	14.4068
128	105.768	387.222		0.267488	0.00174513	0.652416	3.66032	0.0311982	0.852336	0.0992462	0.000765499	0.771314	0.0723771	0.00131495	1.8168	0.292997	0.000252006	0.0860097		1528.04	9.96917	1562.76	13.32	1610	14.3735
129	171.25	615.815		0.275784	0.00173812	0.630248	3.79904	0.0317953	0.83693	0.0999088	0.000764622	0.76532	0.0751543	0.00136671	1.81854	0.23474	0.000424114	0.180674		1570.09	9.89548	1592.54	13.3285	1622.39	14.2389
130	108.046	416.503		0.247855	0.00154627	0.623861	3.11993	0.0258461	0.828421	0.0912947	0.000699226	0.7659	0.0684333	0.00117227	1.71301	0.421368	0.00316315	0.750685		1427.4	8.90501	1437.61	11.9095	1452.76	14.5732
131	78.3114	409.095		0.192055	0.00126111	0.656643	2.30317	0.0200768	0.871705	0.0869761	0.000675457	0.776601	0.0600792	0.00103091	1.71592	0.203125	9.73847e-05	0.0479432		1132.5	7.43645	1213.26	10.5761	1359.96	14.9661
132	146.31	848.154		0.16667	0.00142743	0.856437	2.40021	0.0217168	0.904784	0.104446	0.000831815	0.796409	0.0580541	0.00104329	1.79711	0.258246	0.00140731	0.54495		993.739	8.51075	1242.66	11.2434	1704.58	14.6625
133	75.1097	432.699		0.178601	0.00111394	0.623705	1.88479	0.0158686	0.841928	0.076538	0.000596364	0.779174	0.0500526	0.000980981	1.9599	0.162474	0.000727711	0.447895		1059.33	6.60708	1075.75	9.05703	1109.18	15.5661
134	137.305	514.167		0.259882	0.00184794	0.711069	3.34482	0.0297263	0.888726	0.093346	0.000711471	0.762187	0.0684199	0.00148116	2.16481	0.35128	0.00225872	0.642997		1489.24	10.5895	1491.58	13.2561	1494.92	14.4204
135	176.903	642.285		0.264744	0.00164139	0.61999	3.6626	0.0302637	0.826292	0.100337	0.000773263	0.770664	0.0624766	0.00153601	2.45853	0.424458	0.00304262	0.716826		1514.07	9.38706	1563.26	12.9171	1630.34	14.3236
136	78.5442	365.206		0.197566	0.00123539	0.625308	3.17808	0.0295381	0.929433	0.116668	0.000998763	0.856072	0.0721323	0.00207054	2.87047	0.381008	0.00341608	0.89659		1162.23	7.26751	1451.85	13.494	1905.79	15.3765
137	200.268	763.041		0.237679	0.00155324	0.653503	3.86166	0.0475212	1.23059	0.117837	0.00124683	1.0581	0.0603712	0.00180164	2.98427	0.613691	0.00143199	0.23334		1374.62	8.98318	1605.71	19.7597	1923.68	18.9649
138	51.4084	237.496		0.217332	0.0019819	0.911924	2.78347	0.031926	1.14699	0.0928885	0.000760316	0.818526	0.0555092	0.00140848	2.53738	0.222445	0.00159667	0.717784		1267.76	11.561	1351.11	15.4971	1485.62	15.5057
139	229.76	1072.13		0.206468	0.0014663	0.710181	2.28421	0.019856	0.869274	0.0802382	0.000610769	0.761194	0.0496321	0.00116407	2.34539	0.488411	0.000494199	0.101185		1209.98	8.59302	1207.42	10.4958	1202.85	14.9997
140	85.8628	376.507		0.218926	0.00142428	0.650577	2.6611	0.0225177	0.846178	0.0881581	0.00067975	0.771058	0.0596366	0.00117714	1.97386	0.41777	0.00738623	1.76801		1276.2	8.30266	1317.73	11.1503	1385.93	14.8059
141	74.1579	299.631		0.236896	0.00157795	0.666094	3.14119	0.0280332	0.892438	0.0961688	0.000765915	0.796427	0.0648791	0.00119936	1.8486	0.399258	0.000921581	0.230824		1370.54	9.1291	1442.84	12.8765	1551.07	14.9562
142	184.619	796.417		0.231681	0.00162858	0.702941	2.84766	0.0249368	0.875695	0.0891448	0.000670349	0.751977	0.0547274	0.00110293	2.01531	0.278455	0.000175491	0.0630229		1343.3	9.44263	1368.19	11.9812	1407.27	14.3972
143	107.698	438.361		0.230097	0.00156845	0.681648	2.9224	0.0245233	0.839147	0.0921143	0.000718709	0.780236	0.0607306	0.00109446	1.80216	0.529239	0.00492251	0.930113		1335.01	9.10006	1387.73	11.6451	1469.74	14.8119
144	82.0499	344.731		0.224653	0.0015264	0.679449	2.81011	0.0248075	0.882798	0.0907212	0.000716769	0.790078	0.0661299	0.0012857	1.94421	0.447054	0.00157155	0.351535		1306.42	8.87642	1358.23	11.9905	1440.76	15.0577
145	93.511	260.931		0.310718	0.00255665	0.822819	6.07478	0.065876	1.08442	0.141796	0.00146612	1.03397	0.118971	0.003613	3.03688	0.491599	0.00105568	0.214744		1744.24	14.3519	1986.63	21.5434	2249.25	17.8627
146	39.6462	180.179		0.217753	0.00144138	0.661932	2.41721	0.0233964	0.96791	0.0805099	0.000702066	0.872024	0.0625584	0.0011348	1.81398	0.298413	0.00590834	1.97992		1269.99	8.40648	1247.73	12.0769	1209.51	17.1671
147	16.1445	57.0057		0.268307	0.00212444	0.791794	3.68689	0.0465533	1.26267	0.0996612	0.00119352	1.19758	0.0712002	0.00135303	1.90032	0.445457	0.000852561	0.19139		1532.2	12.1319	1568.53	19.8054	1617.77	22.2945
148	89.8505	353.847		0.240694	0.00155299	0.645213	3.21583	0.0334257	1.03941	0.0969009	0.000954591	0.985122	0.0666932	0.00125165	1.87673	0.434201	0.00127281	0.29314		1390.3	8.97041	1460.98	15.1856	1565.3	18.4652
149	127.161	518.273		0.246216	0.00158862	0.645213	3.18161	0.0330701	1.03941	0.0937195	0.000923251	0.985122	0.0622618	0.0012341	1.98211	0.223731	0.00126973	0.567526		1418.93	9.15512	1452.71	15.0996	1502.47	18.6195
150	37.5971	125.827		0.270823	0.0015908	0.587395	3.5567	0.0261408	0.734975	0.0952492	0.000663492	0.696586	0.0719807	0.00156688	2.1768	0.666921	0.00811267	1.21644		1544.98	9.07511	1539.93	11.3181	1533.01	13.1126
151	25.8842	76.9023		0.279563	0.00164214	0.587395	3.74511	0.0275256	0.734975	0.0971591	0.000676797	0.696586	0.0759832	0.00179761	2.36581	1.06899	0.00254307	0.237896		1589.16	9.33465	1581.07	11.6204	1570.29	13.0483
152	54.8194	223.907		0.242514	0.00142452	0.587395	3.22341	0.0236913	0.734975	0.0964001	0.00067151	0.696586	0.0666685	0.0020552	3.08272	0.250407	0.000798268	0.318788		1399.75	8.22209	1462.81	10.7512	1555.58	13.0735
153	53.1149	85.4751		0.519994	0.00305442	0.587395	13.1191	0.096422	0.734975	0.18298	0.00127461	0.696586	0.137923	0.00374485	2.71517	0.734822	0.00181961	0.247627		2699.16	15.8547	2688.26	19.758	2680.07	11.5228
154	78.7874	239.181		0.299573	0.00175968	0.587395	4.92881	0.0362255	0.734975	0.119327	0.000831215	0.696586	0.102511	0.00248521	2.42434	0.435538	0.00355342	0.815868		1689.19	9.92222	1807.2	13.2825	1946.17	12.4522
155	48.5333	129.855		0.332673	0.00195411	0.587395	6.25237	0.0459533	0.734975	0.136309	0.000949511	0.696586	0.144747	0.00383719	2.65097	0.366524	0.00510918	1.39396		1851.33	10.8746	2011.81	14.7863	2180.83	12.124
156	28.9727	142.992		0.202204	0.00118773	0.587395	2.19787	0.0161538	0.734975	0.0788335	0.000549143	0.696586	0.0567421	0.00112308	1.97926	0.277014	0.000721244	0.260364		1187.15	6.97325	1180.37	8.6754	1167.96	13.7963
157	61.6576	237.437		0.251703	0.00147849	0.587395	3.26431	0.0239918	0.734975	0.094059	0.000655202	0.696586	0.0621532	0.00109198	1.75691	0.390793	0.00127522	0.326315		1447.25	8.5011	1472.59	10.8232	1509.3	13.154
158	14.7736	75.4322		0.200233	0.00117616	0.587395	2.14161	0.0157403	0.734975	0.0775718	0.000540354	0.696586	0.0533497	0.00121091	2.26975	0.193735	0.000264974	0.136771		1176.57	6.91113	1162.35	8.54295	1135.93	13.8613
159	115.802	278.741		0.361498	0.00212342	0.587395	6.0783	0.0446739	0.734975	0.121948	0.000849474	0.696586	0.0818365	0.00139297	1.70214	0.897789	0.00239296	0.266539		1989.27	11.6849	1987.14	14.605	1984.92	12.3958
160	43.0404	158.103		0.273497	0.00160651	0.587395	3.88899	0.0285831	0.734975	0.10313	0.000718386	0.696586	0.0777308	0.00149866	1.92802	0.161546	0.00300109	1.85773		1558.53	9.1547	1611.4	11.8434	1681.19	12.8628
